# Supplementary material for: Two decades of trends in ground water chemical composition in The Great Vasyugan Mire, Western Siberia, Russia
Source: Springer Nature journal article supplement (doi:10.1007/s12665-014-3908-z), 2015-01-06
Supplement: MOESM3 [file 11840630]

APPENDIX III

CHEMICAL COMPOSITION OF GROUND WATER SAMPLES COLLECTED AT SAMPLING STATION #3

APPENDIX III CONTINUED
